# Supplementary material for: Structural studies suggest aggregation as one of the modes of action for teixobactin
Source: PubMed Central journal article supplement (PMC6296168; doi:10.1039/c8sc03655a), 2018-09-20
Supplement: SC-009-C8SC03655A-s001.pdf [file SC-009-C8SC03655A-s001.pdf]

## Electronic Supplementary Information for

### “Structural studies suggest aggregation as one of the modes of action for teixobactin”

Carl Öster<sup>a</sup>, Grzegorz P. Walkowiak<sup>a, b</sup>, Dallas E. Hughes<sup>c</sup>, Amy L. Spoering<sup>c</sup>,  
Aaron J. Peoples<sup>c</sup>, Anita C. Catherwood<sup>b</sup>, Julie A. Tod<sup>b</sup>, Adrian J. Lloyd<sup>b</sup>,  
Torsten Herrmann<sup>d</sup>, Kim Lewis<sup>e</sup>, Christopher G. Dowson<sup>b</sup>, Józef R.  
Lewandowski<sup>a\*</sup>

<sup>a</sup>Department of Chemistry, University of Warwick, Coventry, CV4 7AL, U.K.

<sup>b</sup>School of Life Sciences, University of Warwick, Coventry, CV4 7AL, U.K.

<sup>c</sup>NovoBiotic Pharmaceuticals, Cambridge, MA02138, USA

<sup>d</sup>Centre de Résonance Magnétique Nucléaire à Très Hauts Champs, Institut des Sciences Analytiques (UMR 5280 – CNRS, Ecole Normale Supérieure de Lyon, Université Claude Bernard Lyon 1), Université de Lyon, 69100 Villeurbanne, France

<sup>e</sup>Antimicrobial Discovery Center, Northeastern University, Department of Biology, Boston, Massachusetts 02115, USA

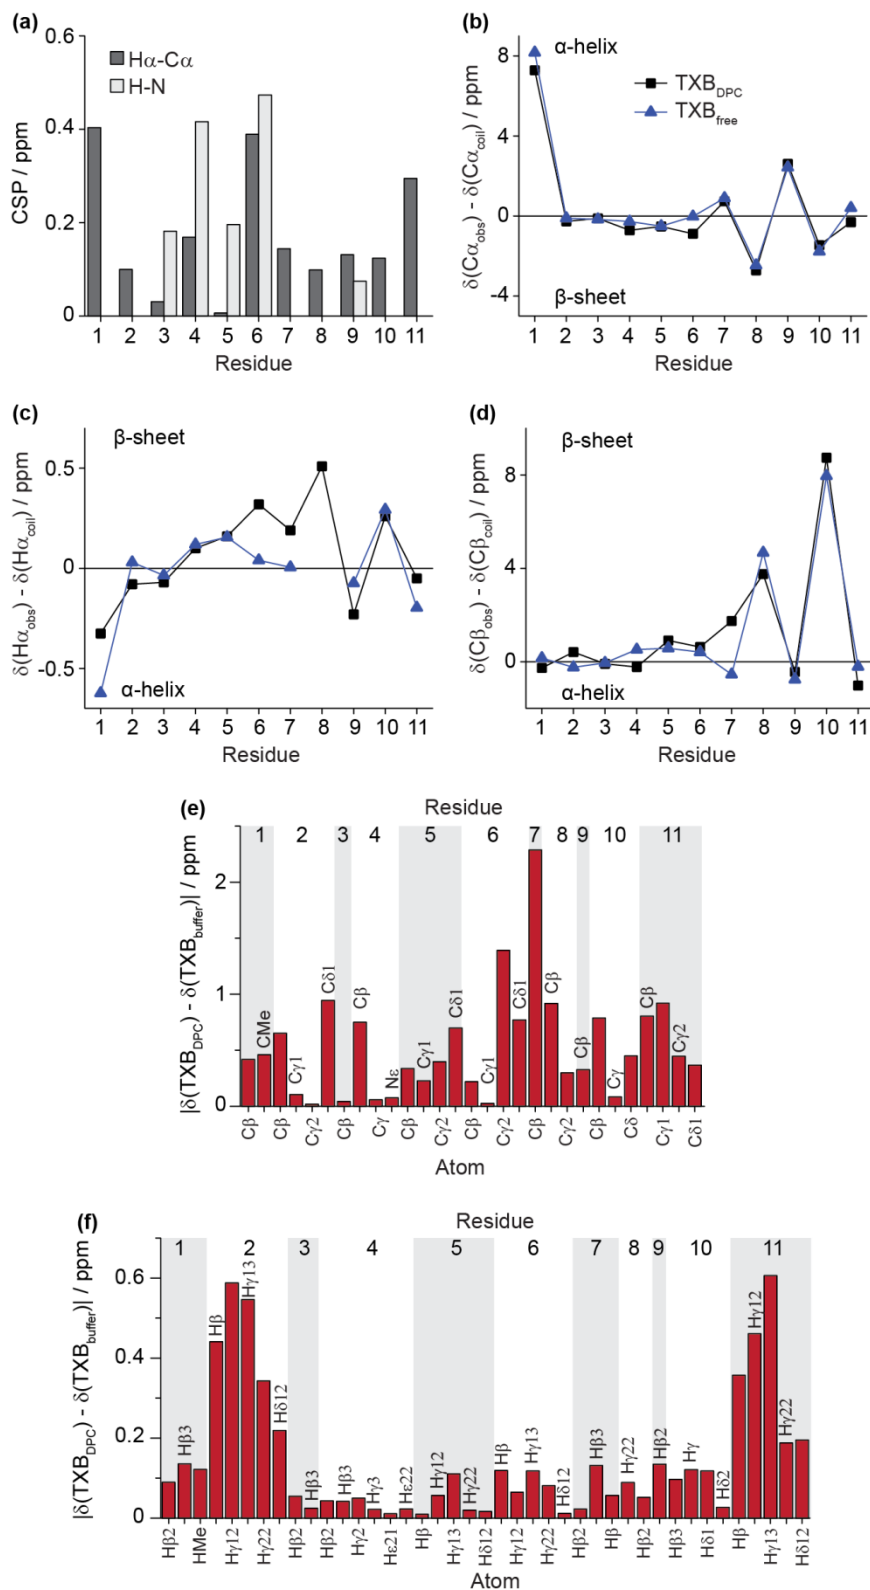

**Figure ES11.** Comparison of chemical shifts between teixobactin in phosphate buffer in the presence and absence of DPC micelles. (a) Chemical shift perturbations (CSP). (b)  $C\alpha$  secondary chemical shifts. (c)  $H\alpha$  secondary chemical shifts. (d)  $C\beta$  secondary chemical shifts. (e) Chemical shift differences for side-chain carbons and nitrogens. (f) Chemical shift differences for side-chain protons.

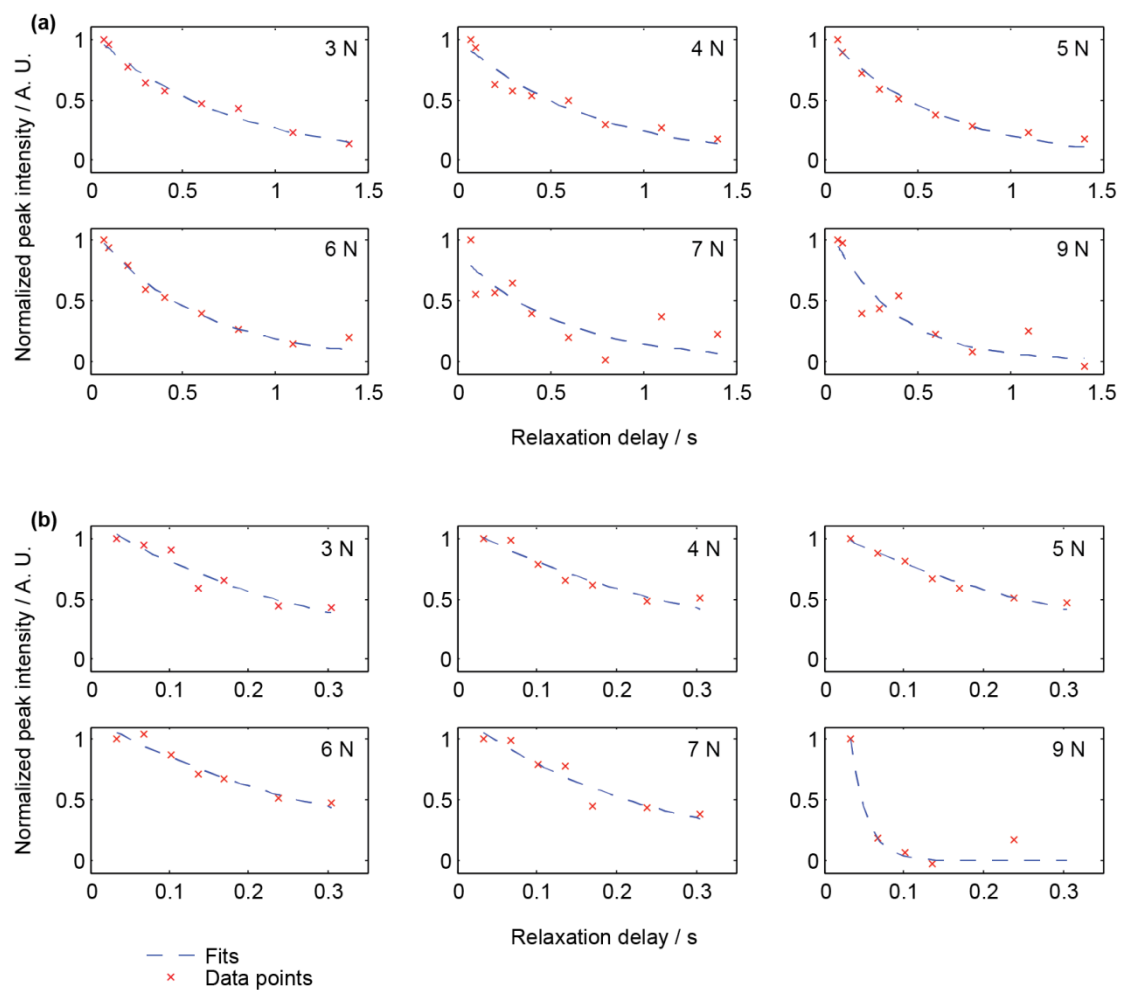

**Figure ES12.** Solution NMR  $^{15}\text{N}$   $R_1$  (a) and  $R_2$  (b) relaxation measurements for teixobactin in aqueous solution (red crosses). Dashed blue lines indicate the best fits to a single decaying exponential. Data obtained at 700 MHz  $^1\text{H}$  Larmor frequency and a sample temperature of 25  $^\circ\text{C}$ .

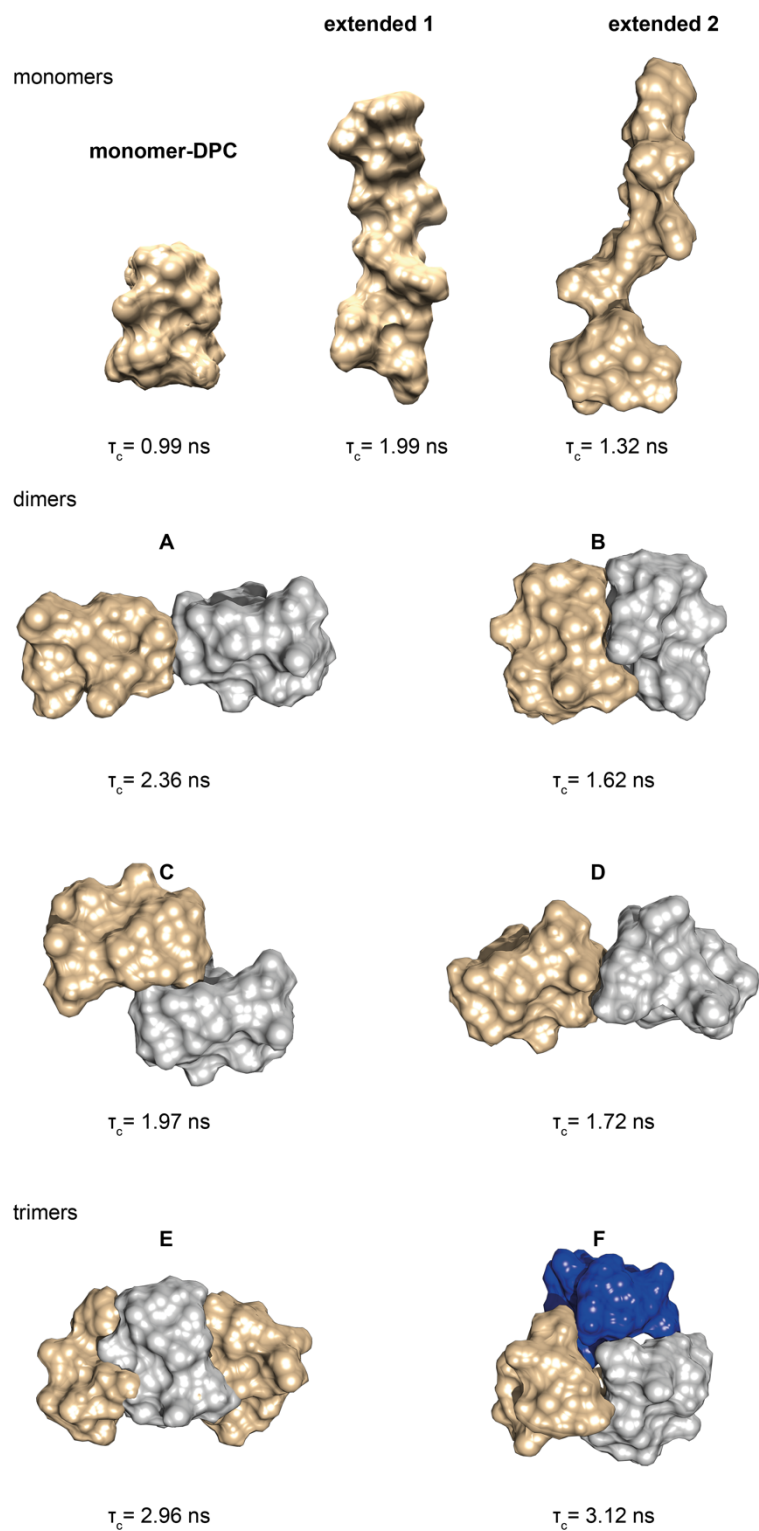

**Figure ESI3.** Models of potential dimers and trimers based on the NMR structure of teixobactin. Correlation times were predicted using HYDRONMR<sup>1</sup> based on each of the model and are compared with correlation times calculated from <sup>15</sup>N  $T_1$  and  $T_2$  relaxation times in SI table 3.

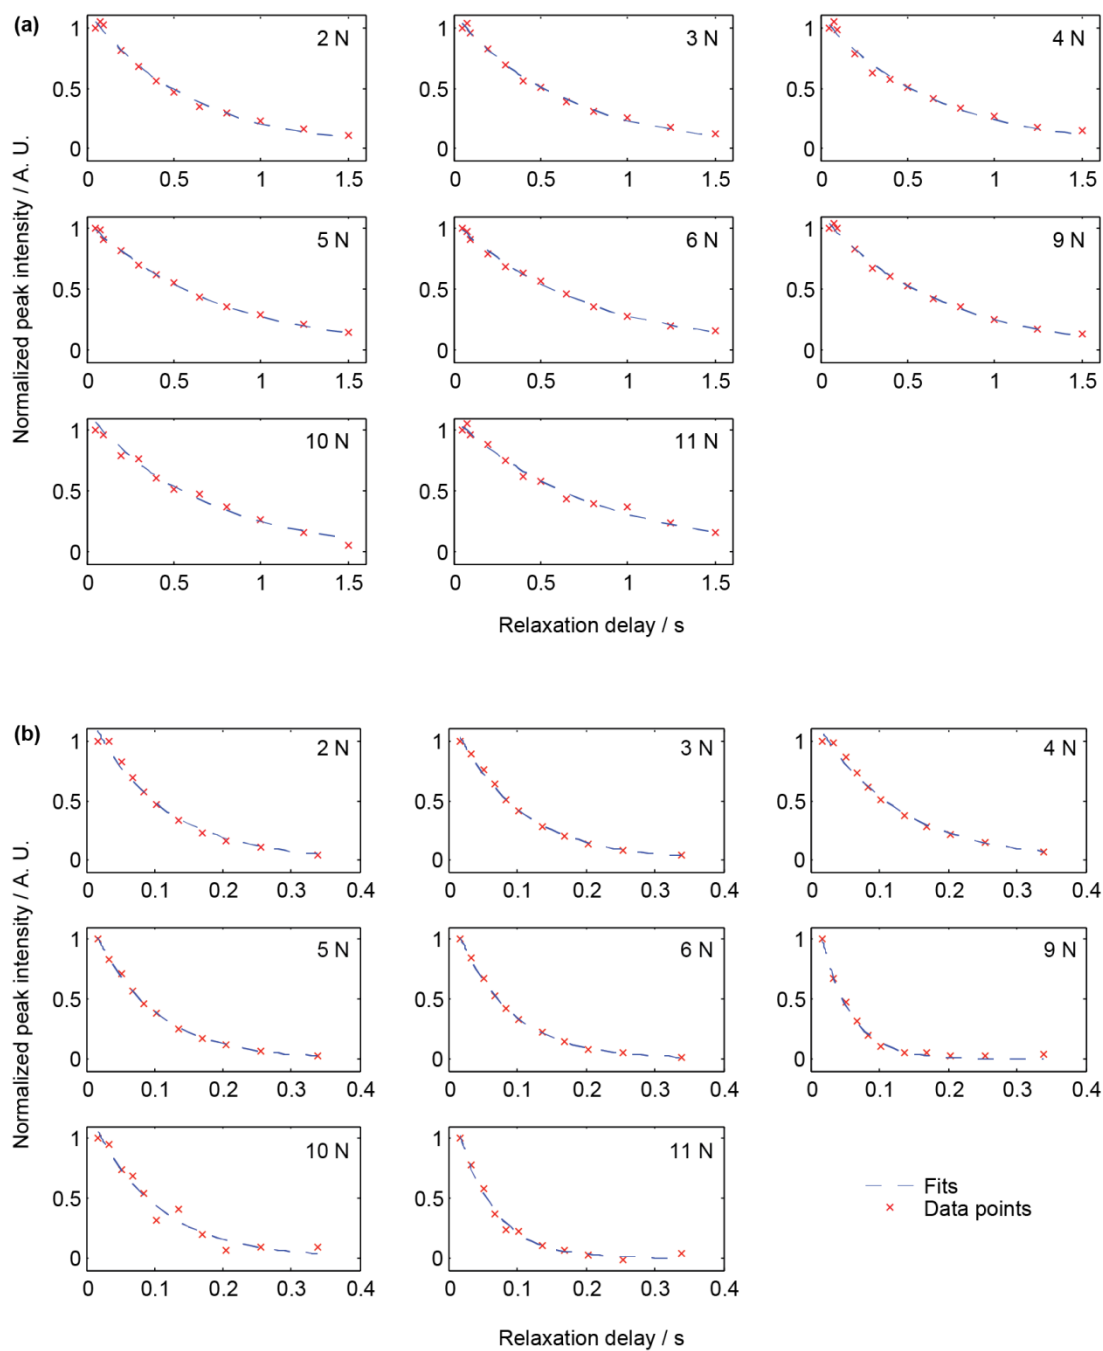

**Figure ESI4.** Solution NMR  $^{15}\text{N}$   $R_1$  (a) and  $R_2$  (b) relaxation measurements for teixobactin in DPC micelles (red crosses). Dashed blue lines indicate the best fits to a single decaying exponential. Data obtained at 700 MHz  $^1\text{H}$  Larmor frequency and a sample temperature of 25  $^\circ\text{C}$ .

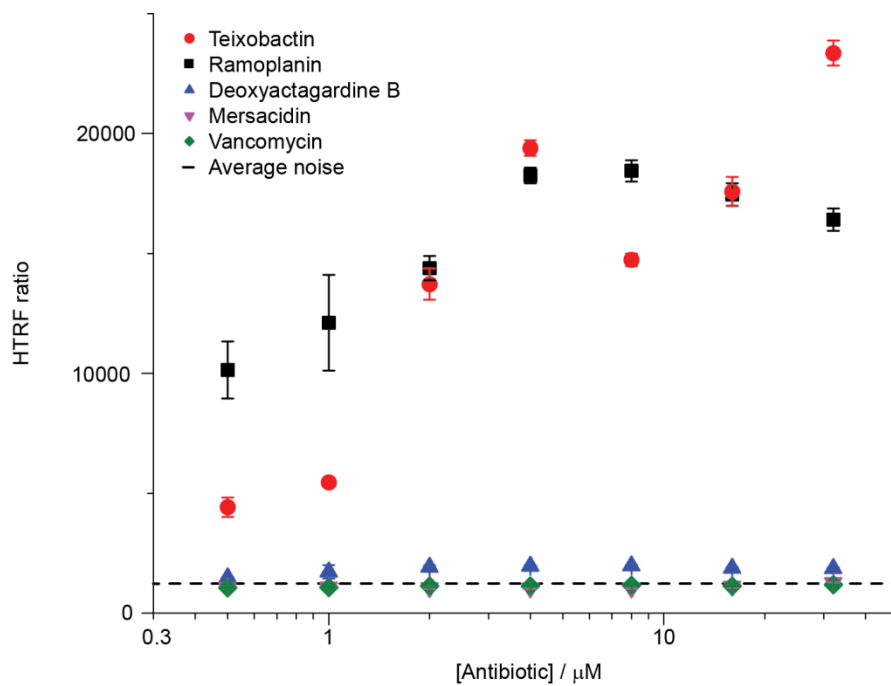

**Figure ES15.** Evolution of FRET signal in presence of lipid II-binding antibiotics. Data points represent mean values of 3 replicates. Error bars show standard deviation. The high HTRF (Homogeneous Time-Resolved Fluorescence) ratio is indicative of aggregation.

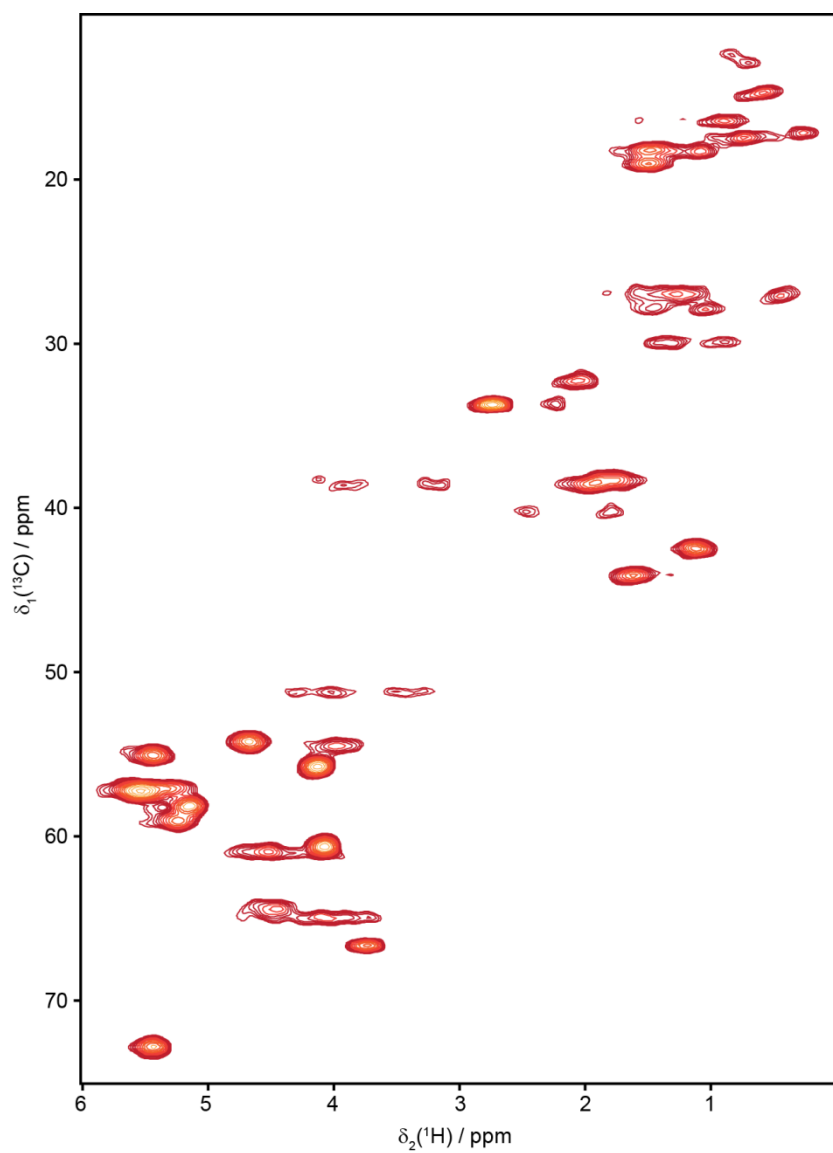

**Figure ES16.**  $^1\text{H}$  detected cross-polarisation based 2D  $^1\text{H}$ - $^{13}\text{C}$  solid state NMR correlation spectrum of sedimented [ $^{13}\text{C}$ - $^{15}\text{N}$ ]teixobactin in complex with natural abundance Gram-negative lipid II in DPC micelles. Data acquired at 600 MHz  $^1\text{H}$  Larmor frequency and 90 kHz magic angle spinning frequency.

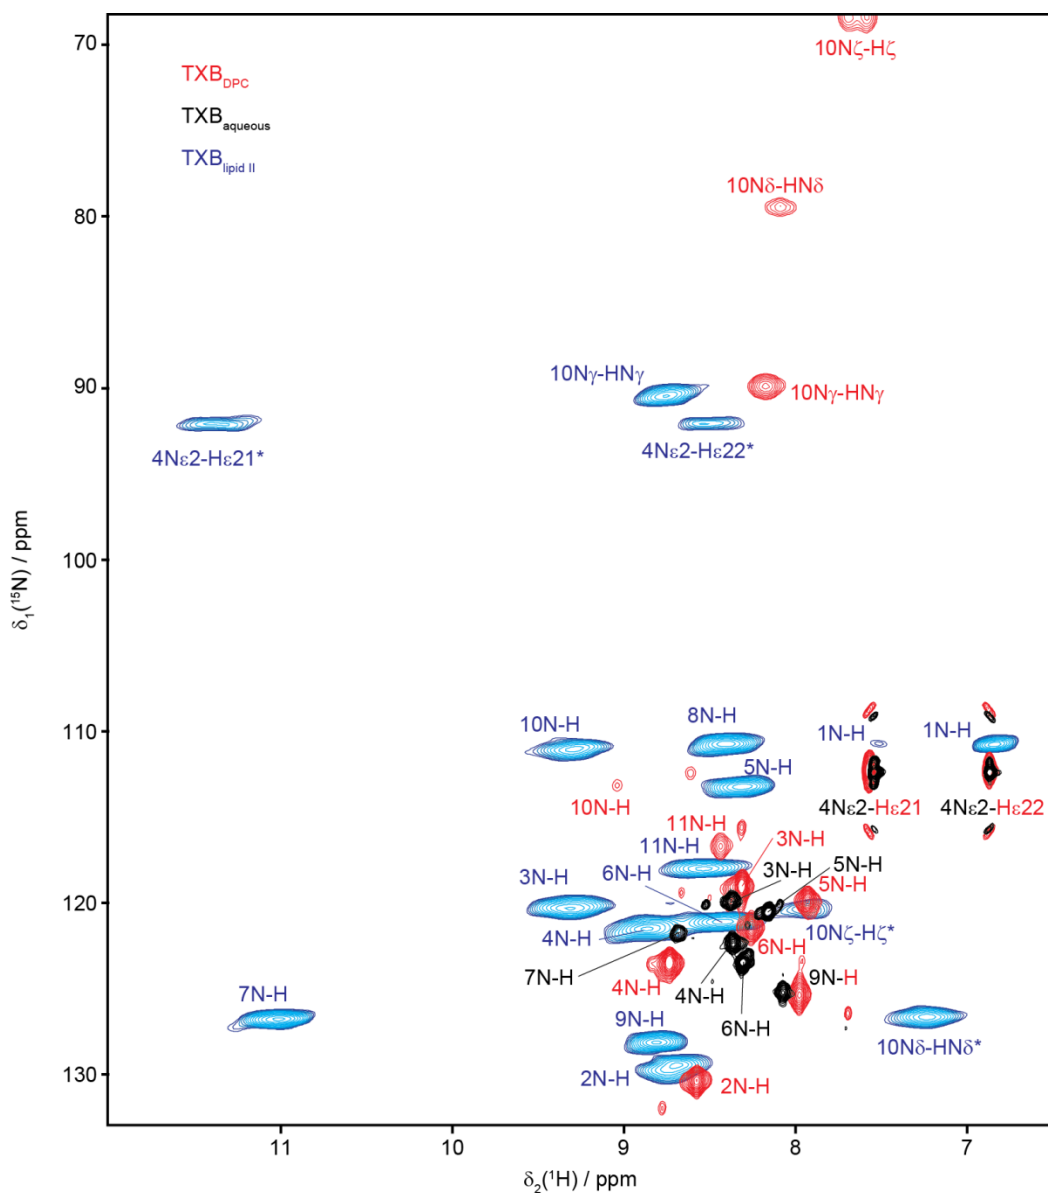

**Figure ESI7.** Overlay of 2D  $^1\text{H}$ - $^{15}\text{N}$  correlation spectra of  $[\text{U}^{13}\text{C}\text{-}^{15}\text{N}]$ teixobactin in aqueous solution in DPC micelles ( $\text{TXB}_{\text{DPC}}$ ; red),  $[\text{U}^{13}\text{C}\text{-}^{15}\text{N}]$ teixobactin in aqueous solution in the absence of DPC micelles ( $\text{TXB}_{\text{aqueous}}$ ; black) and solid-state sedimented complex of  $[\text{U}^{13}\text{C}\text{-}^{15}\text{N}]$ teixobactin with lipid II in the presence of DPC micelles ( $\text{TXB}_{\text{lipid II}}$ ; blue). Solution NMR data were acquired at a 700 MHz spectrometer and solid-state NMR data were obtained at 600 MHz  $^1\text{H}$  Larmor frequency and 90 kHz magic angle spinning frequency. The sedimented sample was prepared from a solution NMR sample used for titrations of teixobactin with lipid II.



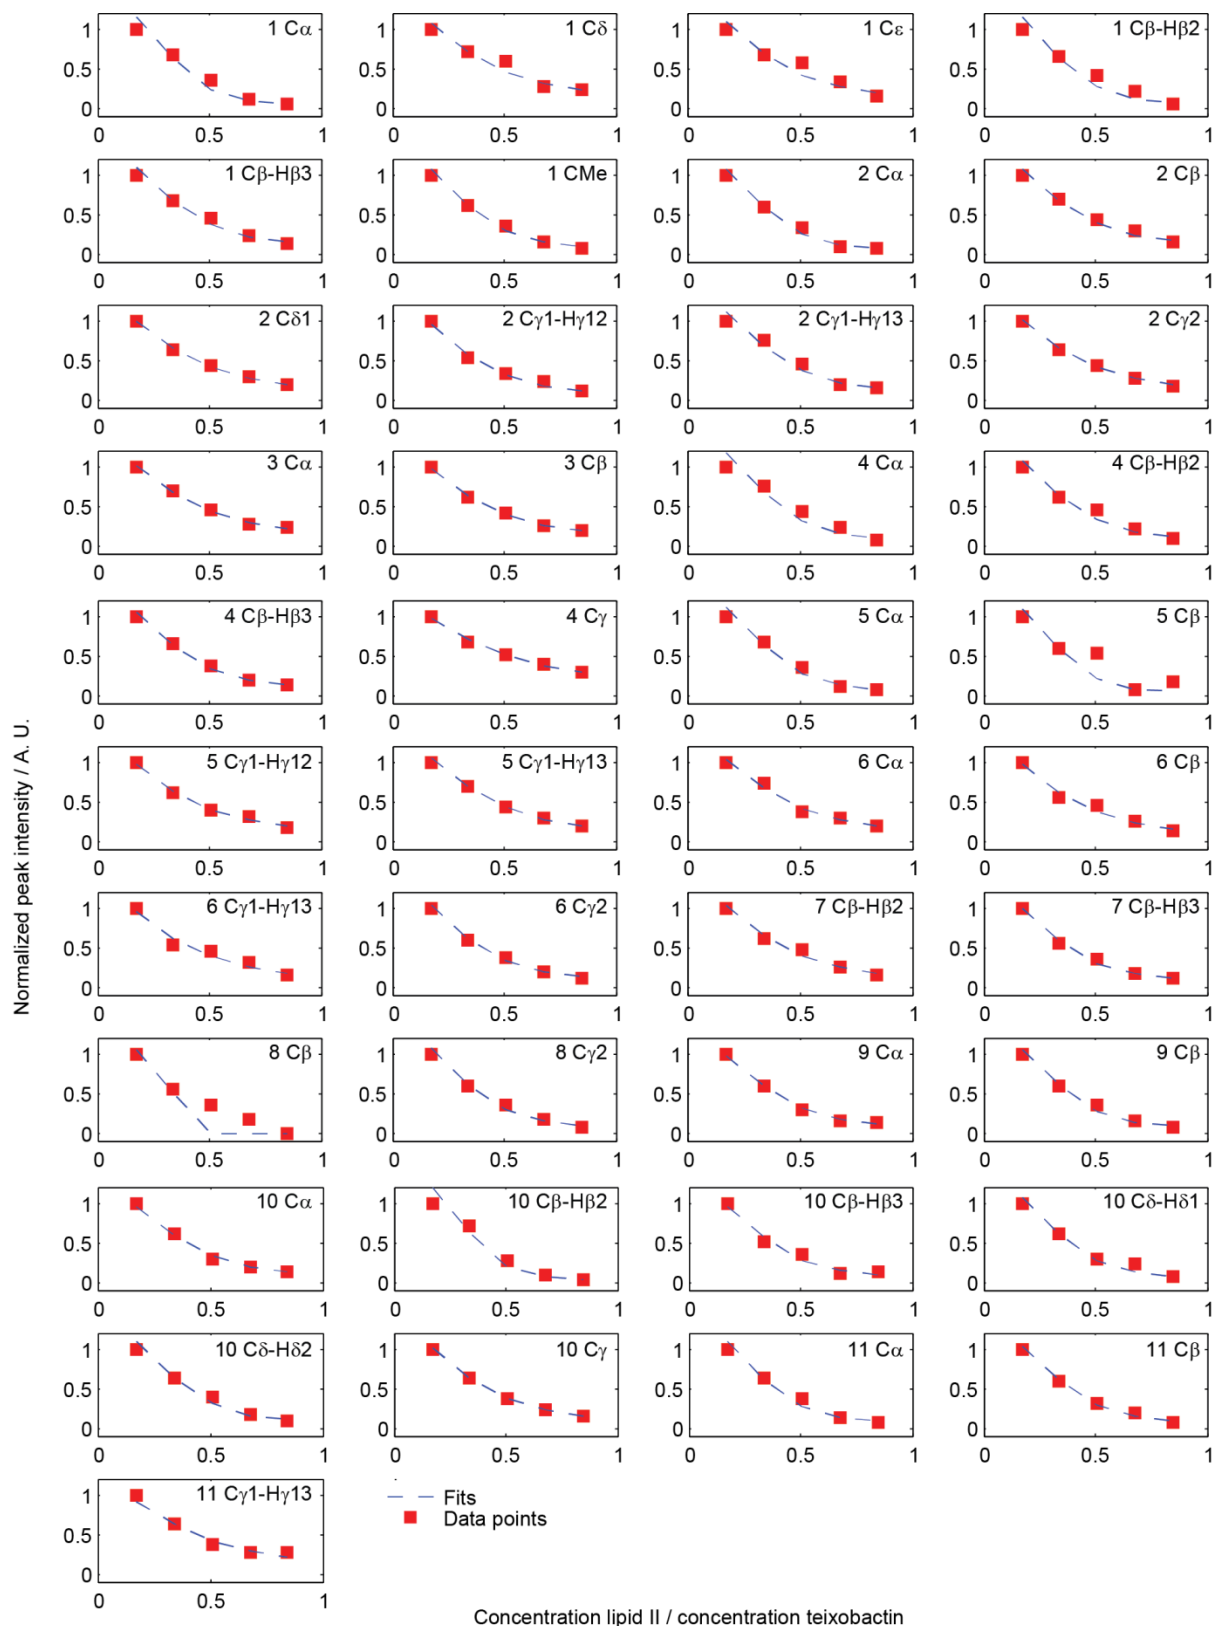

**Figure ES18.** NMR titration of teixobactin with water soluble Gram-positive lipid II performed in aqueous solution. Red squares represent experimental data points. Dashed blue lines represent the best fits to equation 2 (see Methods section) assuming 2:1 binding of teixobactin to lipid II. The best fit values for local apparent  $K_d$  are given in SI table 4. The data were acquired using  $^1\text{H}$ - $^{13}\text{C}$  HSQC spectra at 700 MHz  $^1\text{H}$  Larmor frequency and a sample temperature of 25 °C.

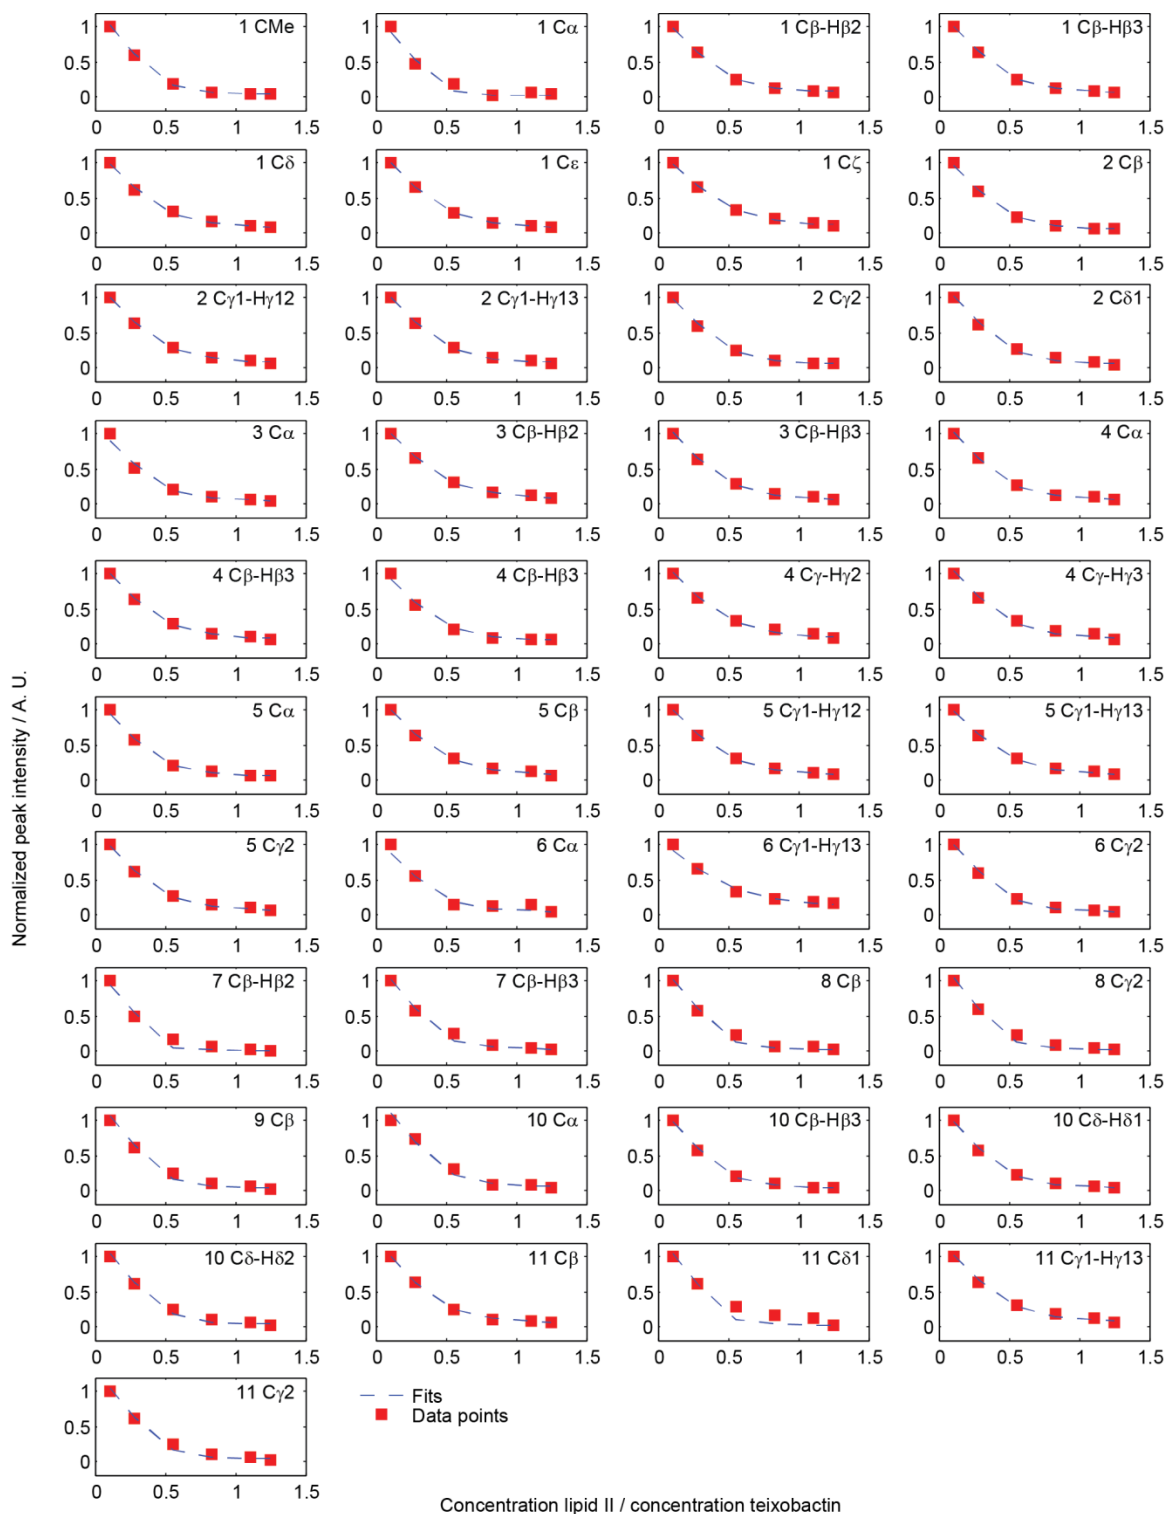

**Figure ESI9.** NMR titration of teixobactin with Gram-negative lipid II in DPC micelles. Red squares represent experimental data points. Dashed blue lines represent the best fits to equation 2 (see Methods section) assuming 2:1 binding of teixobactin to lipid II. The best fit values for local apparent  $K_d$  are given in SI table 5. The data were acquired using  $^1\text{H}$ - $^{13}\text{C}$  HSQC spectra at 700 MHz  $^1\text{H}$  Larmor frequency and a sample temperature of 25 °C .

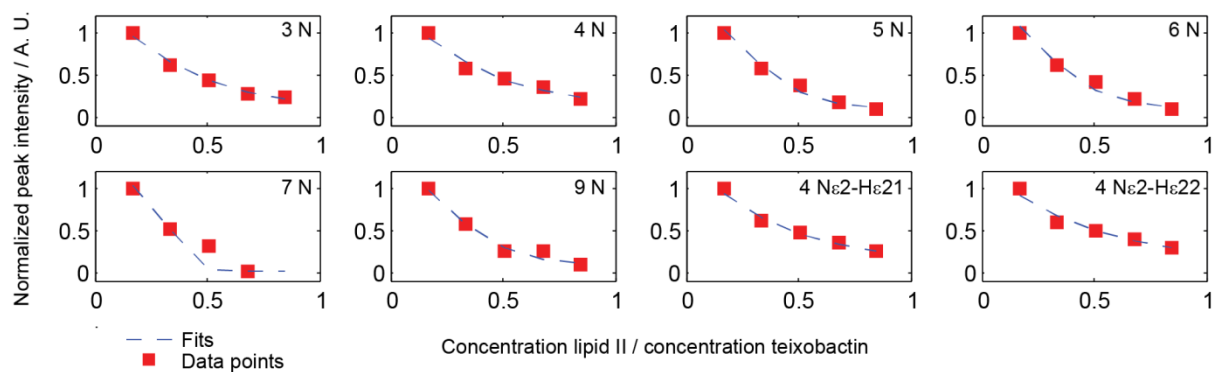

**Figure ES110.** NMR titration of teixobactin with water soluble Gram-positive lipid II in aqueous solution. Red squares represent data points. Dashed blue lines represent the best fits to equation 2 (see Methods section) assuming 2:1 binding of teixobactin to lipid II. The best fit values for local apparent  $K_d$  are given in SI table 4. The data were acquired using  $^1\text{H}$ - $^{15}\text{N}$  SOFAST-HMQC spectra at 700 MHz  $^1\text{H}$  Larmor frequency and a sample temperature of 25 °C.

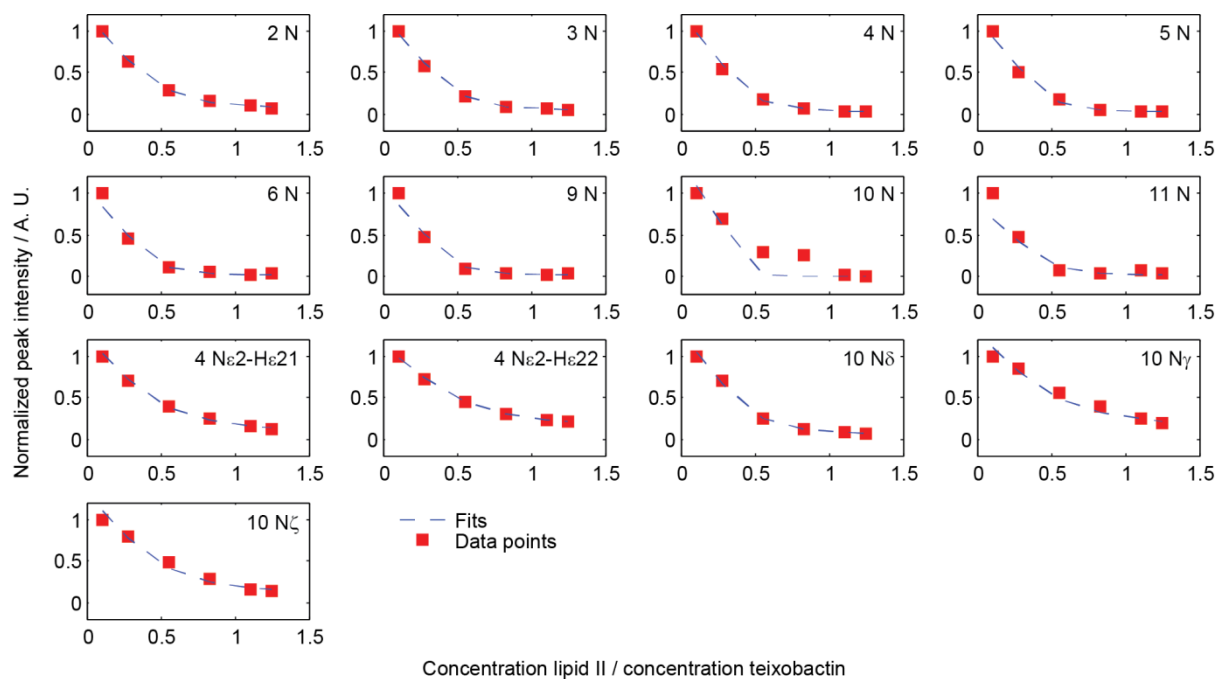

**Figure ES111.** NMR titration of teixobactin with Gram-negative lipid II in DPC micelles. Red squares represent data points. Dashed blue lines represent the best fits to equation 2 (see Methods section) assuming 2:1 binding of teixobactin to lipid II. The best fit values for local apparent  $K_d$  are given in SI table 5. The data were acquired using  $^1\text{H}$ - $^{15}\text{N}$  SOFAST-HMQC spectra at 700 MHz  $^1\text{H}$  Larmor frequency and a sample temperature of 25 °C.

## Tables

**Table ES11.** Details from structure calculation for teixobactin in DPC micelles, performed using UNIO ATNOS-CANDID<sup>2,3</sup> with CYANA<sup>4</sup> as molecular dynamics software.

| Assigned cross-peaks                                                         | <sup>1</sup> H – <sup>15</sup> N 3D HSQC NOESY | <sup>1</sup> H – <sup>1</sup> H 2D NOESY |
|------------------------------------------------------------------------------|------------------------------------------------|------------------------------------------|
| Total                                                                        | 126                                            | 377                                      |
| Diagonal                                                                     | 0                                              | 0                                        |
| Intraresidual (i = j)                                                        | 52                                             | 197                                      |
| Sequential ( i - j  = 1)                                                     | 48                                             | 123                                      |
| Medium range (1 <  i - j  < 5)                                               | 24                                             | 49                                       |
| Long range ( i - j  ≥ 5)                                                     | 2                                              | 8                                        |
| Distance restraints <sup>a</sup>                                             |                                                |                                          |
| Total                                                                        | 235                                            |                                          |
| Intraresidual (i = j)                                                        | 69                                             |                                          |
| Sequential ( i - j  = 1)                                                     | 96                                             |                                          |
| Medium range (1 <  i - j  < 5)                                               | 58                                             |                                          |
| Long range ( i - j  ≥ 5)                                                     | 12                                             |                                          |
| No. of restraints per residue                                                | 21                                             |                                          |
| Backbone RMSD                                                                | < 0.01 Å                                       |                                          |
| Heavy-atom RMSD                                                              | 0.26 ± 0.07 Å                                  |                                          |
| <sup>a</sup> only meaningful, non-redundant distance restraints are reported |                                                |                                          |

**Table ES12.** <sup>15</sup>N backbone relaxation rates for teixobactin measured at 700 MHz <sup>1</sup>H Larmor frequency and a sample temperature of 25 °C.

| Sample | TXB <sub>aqueous</sub> |                                          |        |                                          | TXB <sub>DPC</sub> |                                          |        |                                          |       |
|--------|------------------------|------------------------------------------|--------|------------------------------------------|--------------------|------------------------------------------|--------|------------------------------------------|-------|
|        | Residue                | <i>R</i> <sub>1</sub> (s <sup>-1</sup> ) | error  | <i>R</i> <sub>2</sub> (s <sup>-1</sup> ) | error              | <i>R</i> <sub>2</sub> (s <sup>-1</sup> ) | error  | <i>R</i> <sub>2</sub> (s <sup>-1</sup> ) | error |
| 1      |                        |                                          |        |                                          |                    |                                          |        |                                          |       |
| 2      |                        |                                          |        |                                          | 1.720              | 0.007                                    | 9.597  | 0.043                                    |       |
| 3      | 1.411                  | 0.100                                    | 3.674  | 0.209                                    | 1.580              | 0.004                                    | 10.552 | 0.032                                    |       |
| 4      | 1.448                  | 0.097                                    | 3.289  | 0.188                                    | 1.541              | 0.004                                    | 8.454  | 0.027                                    |       |
| 5      | 1.661                  | 0.040                                    | 3.202  | 0.069                                    | 1.352              | 0.005                                    | 11.394 | 0.045                                    |       |
| 6      | 1.778                  | 0.049                                    | 3.280  | 0.088                                    | 1.319              | 0.005                                    | 12.935 | 0.073                                    |       |
| 7      | 1.854                  | 0.460                                    | 4.142  | 0.731                                    |                    |                                          |        |                                          |       |
| 8      |                        |                                          |        |                                          |                    |                                          |        |                                          |       |
| 9      | 2.866                  | 0.655                                    | 50.312 | 25.125                                   | 1.506              | 0.018                                    | 23.437 | 0.620                                    |       |
| 10     |                        |                                          |        |                                          | 1.526              | 0.114                                    | 10.393 | 0.958                                    |       |
| 11     |                        |                                          |        |                                          | 1.275              | 0.03                                     | 18.934 | 0.708                                    |       |

**Table ESI3.** Correlation times ( $\tau_c$ ) estimated from the relaxation rates in SI table 2, using equation 1 in the Methods section or predicted from the NMR structure of teixobactin as monomer, dimer or trimer using HYDRONMR<sup>1</sup> (see SI figure 4).

| Sample  | TXB <sub>aqueous</sub> |       | TXB <sub>DPC</sub> |       | Predicted        |               |
|---------|------------------------|-------|--------------------|-------|------------------|---------------|
| Residue | $\tau_c$ (ns)          | error | $\tau_c$ (ns)      | error | Model            | $\tau_c$ (ns) |
| 1       |                        |       |                    |       | monomer-DPC      | 0.99          |
| 2       |                        |       | 5.77               | 0.03  | monomer-extended | 1.32-1.99     |
| 3       | 3.29                   | 0.30  | 6.45               | 0.03  | dimer A          | 2.36          |
| 4       | 2.89                   | 0.25  | 5.71               | 0.02  | dimer B          | 1.62          |
| 5       | 2.40                   | 0.08  | 7.40               | 0.04  | dimer C          | 1.97          |
| 6       | 2.26                   | 0.09  | 8.07               | 0.06  | dimer D          | 1.72          |
| 7       | 2.84                   | 0.87  |                    |       | trimer E         | 2.96          |
| 8       |                        |       |                    |       | trimer F         | 3.12          |
| 9       | 11.12                  | 6.11  | 10.42              | 0.30  |                  |               |
| 10      |                        |       | 6.53               | 0.77  |                  |               |
| 11      |                        |       | 10.16              | 0.45  |                  |               |

**Table ESI4.** Local apparent  $K_d$  values obtained by fitting the data from titration of teixobactin with water soluble Gram-positive lipid II in aqueous solution, to equation 2 (Methods section). 2:1 binding of teixobactin to lipid II is assumed.

| Peak                                 | $K_d$ ( $\mu$ M) | error | Res                                 | $K_d$ ( $\mu$ M) | error |
|--------------------------------------|------------------|-------|-------------------------------------|------------------|-------|
| 1C <sup>Me</sup>                     | 6.08             | 0.38  | 6N                                  | 7.35             | 1.27  |
| 1C <sup><math>\alpha</math></sup>    | 3.22             | 1.81  | 6C <sup><math>\beta</math></sup>    | 2.78             | 5.35  |
| 1C <sup><math>\beta</math></sup>     | 10.71            | 3.12  | 6C <sup><math>\gamma</math>1</sup>  | 24.47            | 6.91  |
| 1C <sup><math>\beta</math></sup>     | 4.36             | 3.18  | 7N                                  | 0.15             | 0.90  |
| 1C <sup><math>\delta</math>a</sup>   | 19.77            | 10.51 | 7C <sup><math>\alpha</math></sup>   | 17.15            | 4.40  |
| 1C <sup><math>\epsilon</math>a</sup> | 15.15            | 6.54  | 7C <sup><math>\beta</math></sup>    | 14.33            | 3.36  |
| 2C <sup><math>\beta</math></sup>     | 6.51             | 3.02  | 7C <sup><math>\beta</math></sup>    | 8.13             | 1.92  |
| 2C <sup><math>\gamma</math>1</sup>   | 16.72            | 5.33  | 8C <sup><math>\beta</math></sup>    | 0.15             | 0.13  |
| 2C <sup><math>\gamma</math>2</sup>   | 9.38             | 0.77  | 8C <sup><math>\gamma</math></sup>   | 6.04             | 0.61  |
| 3N                                   | 22.40            | 4.24  | 9N                                  | 7.98             | 3.09  |
| 3C <sup><math>\alpha</math></sup>    | 19.36            | 3.94  | 9C <sup><math>\alpha</math></sup>   | 9.22             | 3.41  |
| 3C <sup><math>\beta</math></sup>     | 17.29            | 1.21  | 9C <sup><math>\beta</math></sup>    | 5.79             | 0.48  |
| 4N                                   | 25.58            | 4.54  | 10C <sup><math>\alpha</math></sup>  | 10.54            | 4.74  |
| 4C <sup><math>\alpha</math></sup>    | 5.73             | 2.16  | 10C <sup><math>\beta</math></sup>   | 7.33             | 3.68  |
| 4C <sup><math>\beta</math></sup>     | 9.26             | 3.49  | 10C <sup><math>\beta</math></sup>   | 1.94             | 2.37  |
| 4C <sup><math>\beta</math></sup>     | 8.26             | 2.89  | 10C <sup><math>\gamma</math></sup>  | 12.34            | 3.40  |
| 4C <sup><math>\gamma</math></sup>    | 34.94            | 6.02  | 10C <sup><math>\delta</math></sup>  | 4.92             | 1.78  |
| 4N <sup><math>\epsilon</math>2</sup> | 39.86            | 4.73  | 10C <sup><math>\delta</math></sup>  | 6.86             | 1.85  |
| 4N <sup><math>\epsilon</math>2</sup> | 29.74            | 3.16  | 11C <sup><math>\alpha</math></sup>  | 5.49             | 1.70  |
| 5N                                   | 7.24             | 1.09  | 11C <sup><math>\beta</math></sup>   | 12.75            | 5.41  |
| 5C <sup><math>\alpha</math></sup>    | 4.73             | 2.60  | 11C <sup><math>\gamma</math>1</sup> | 9.52             | 3.74  |
| 5C <sup><math>\beta</math></sup>     | 13.73            | 3.74  | 11C <sup><math>\gamma</math>1</sup> | 10.79            | 5.18  |
| 5C <sup><math>\gamma</math>1</sup>   | 17.70            | 5.01  | 11C <sup><math>\gamma</math>2</sup> | 16.33            | 0.61  |
| 5C <sup><math>\gamma</math>1</sup>   | 17.27            | 4.89  | 11C <sup><math>\delta</math>1</sup> | 18.09            | 0.91  |

<sup>a</sup> assignments for the aromatics are ambiguous

**Table ES15.** Local apparent  $K_d$  values obtained by fitting the data from titration of teixobactin with Gram-negative lipid II in DPC micelles to equation 2 (Methods section). 2:1 binding of teixobactin to lipid II is assumed.

| Peak                                 | $K_d$ ( $\mu\text{M}$ ) | error | Peak                                | $K_d$ ( $\mu\text{M}$ ) | error |
|--------------------------------------|-------------------------|-------|-------------------------------------|-------------------------|-------|
| 1C <sup>Me</sup>                     | 40.40                   | 0.91  | 5C <sup><math>\beta</math></sup>    | 125.47                  | 13.44 |
| 1C <sup><math>\alpha</math></sup>    | 19.51                   | 16.16 | 5C <sup><math>\gamma</math>1</sup>  | 129.87                  | 8.75  |
| 1C <sup><math>\beta</math></sup>     | 109.17                  | 17.40 | 5C <sup><math>\gamma</math>1</sup>  | 136.43                  | 12.76 |
| 1C <sup><math>\beta</math></sup>     | 93.81                   | 12.50 | 5C <sup><math>\gamma</math>2</sup>  | 101.21                  | 1.79  |
| 1C <sup><math>\delta</math></sup>    | 125.63                  | 35.51 | 6N                                  | 37.43                   | 17.83 |
| 1C <sup><math>\epsilon</math></sup>  | 129.70                  | 19.68 | 6C <sup><math>\alpha</math></sup>   | 74.13                   | 23.57 |
| 1C <sup><math>\zeta</math></sup>     | 189.04                  | 52.89 | 6C <sup><math>\gamma</math>1</sup>  | 287.36                  | 18.66 |
| 2N                                   | 132.80                  | 14.31 | 6C <sup><math>\gamma</math>2</sup>  | 64.31                   | 1.86  |
| 2C <sup><math>\beta</math></sup>     | 84.32                   | 14.86 | 7C <sup><math>\beta</math></sup>    | 6.13                    | 7.11  |
| 2C <sup><math>\gamma</math>1</sup>   | 114.68                  | 17.62 | 7C <sup><math>\beta</math></sup>    | 35.97                   | 23.77 |
| 2C <sup><math>\gamma</math>1</sup>   | 110.62                  | 11.82 | 8C <sup><math>\beta</math></sup>    | 25.69                   | 25.46 |
| 2C <sup><math>\gamma</math>2</sup>   | 78.74                   | 1.24  | 8C <sup><math>\gamma</math>2</sup>  | 26.38                   | 2.78  |
| 2C <sup><math>\delta</math>1</sup>   | 81.30                   | 1.66  | 9 N                                 | 35.89                   | 19.97 |
| 3N                                   | 75.76                   | 9.07  | 9C <sup><math>\beta</math></sup>    | 46.13                   | 2.38  |
| 3C <sup><math>\alpha</math></sup>    | 70.77                   | 17.93 | 10N                                 | 2.65                    | 62.07 |
| 3C <sup><math>\beta</math></sup>     | 136.05                  | 6.72  | 10C <sup><math>\alpha</math></sup>  | 64.02                   | 15.16 |
| 3C <sup><math>\beta</math></sup>     | 103.31                  | 6.40  | 10C <sup><math>\beta</math></sup>   | 60.64                   | 50.01 |
| 4N                                   | 42.68                   | 7.21  | 10C <sup><math>\delta</math></sup>  | 69.20                   | 15.56 |
| 4C <sup><math>\alpha</math></sup>    | 98.62                   | 16.73 | 10C <sup><math>\delta</math></sup>  | 47.13                   | 10.10 |
| 4C <sup><math>\beta</math></sup>     | 116.41                  | 13.34 | 10N <sup><math>\gamma</math></sup>  | 377.36                  | 86.42 |
| 4C <sup><math>\beta</math></sup>     | 90.50                   | 14.99 | 10N <sup><math>\delta</math></sup>  | 96.62                   | 23.15 |
| 4C <sup><math>\gamma</math></sup>    | 147.93                  | 7.80  | 10N <sup><math>\zeta</math></sup>   | 239.23                  | 50.74 |
| 4C <sup><math>\gamma</math></sup>    | 127.06                  | 7.58  | 11N                                 | 52.47                   | 62.05 |
| 4N <sup><math>\epsilon</math>2</sup> | 230.41                  | 11.68 | 11C <sup><math>\beta</math></sup>   | 93.28                   | 50.38 |
| 4N <sup><math>\epsilon</math>2</sup> | 423.73                  | 21.15 | 11C <sup><math>\gamma</math>1</sup> | 123.00                  | 11.80 |
| 5N                                   | 44.39                   | 16.15 | 11C <sup><math>\gamma</math>2</sup> | 43.69                   | 1.31  |
| 5C <sup><math>\alpha</math></sup>    | 85.25                   | 18.97 | 11C <sup><math>\delta</math>1</sup> | 19.92                   | 1.79  |

## References

1. García de la Torre, J., Huertas, M. . & Carrasco, B. HYDRONMR: Prediction of NMR Relaxation of Globular Proteins from Atomic-Level Structures and Hydrodynamic Calculations. *J. Magn. Reson.* **147**, 138–146 (2000).
2. Herrmann, T., Güntert, P. & Wüthrich, K. Protein NMR structure determination with automated NOE-identification in the NOESY spectra using the new software ATNOS. *J. Biomol. NMR* **24**, 171–89 (2002).
3. Herrmann, T., Güntert, P. & Wüthrich, K. Protein NMR structure determination with automated NOE assignment using the new software CANDID and the torsion angle dynamics algorithm DYANA. *J. Mol. Biol.* **319**, 209–27 (2002).
4. Güntert, P., Mumenthaler, C. & Wüthrich, K. Torsion angle dynamics for NMR structure calculation with the new program Dyana. *J. Mol. Biol.* **273**, 283–298 (1997).
